# Supplementary material
Source: publisher figshare collection journal article supplement (https://tandf.figshare.com/articles/dataset/_/19317787)
Supplement: Supplementary file 1 [file 1]

Archive with 3 entries (3 files):
- ipri_a_2036420_sm2559.docx
- ipri_a_2036420_sm2556.docx
- ipri_a_2036420_sm2553.pdf
